# Supplementary material
Source: PubMed Central journal article supplement (PMC3881997)

## Supplementary Fig. 2: Internet Browsing Patterns by Gender and Race (by Hits)

### By Gender

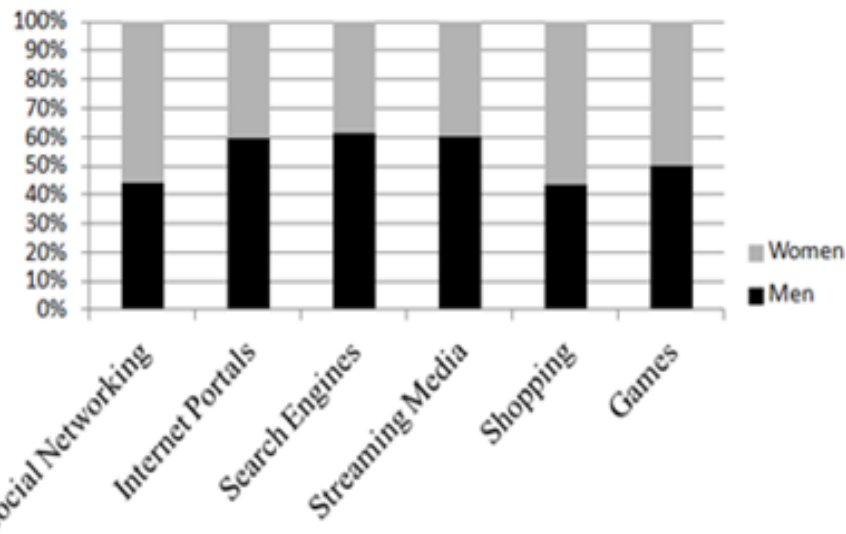

### By Race/Ethnicity

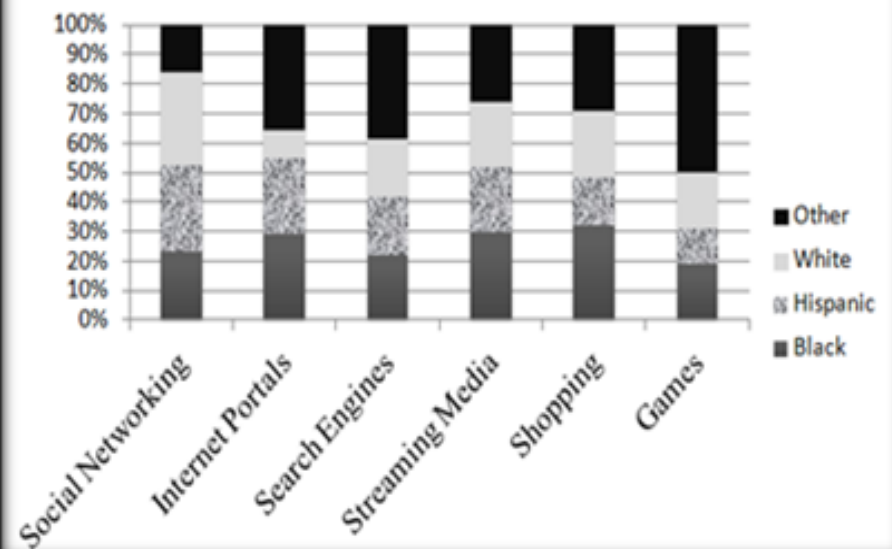

Supplement: supp_lgt029_jnci_JNCI_12_1831_s02.pdf [file supp_lgt029_jnci_JNCI_12_1831_s02.pdf]
