# Supplementary material
Source: PubMed Central journal article supplement (PMC3881997)

# Supplementary Fig 1. Top Ten Domains by Number of Hits

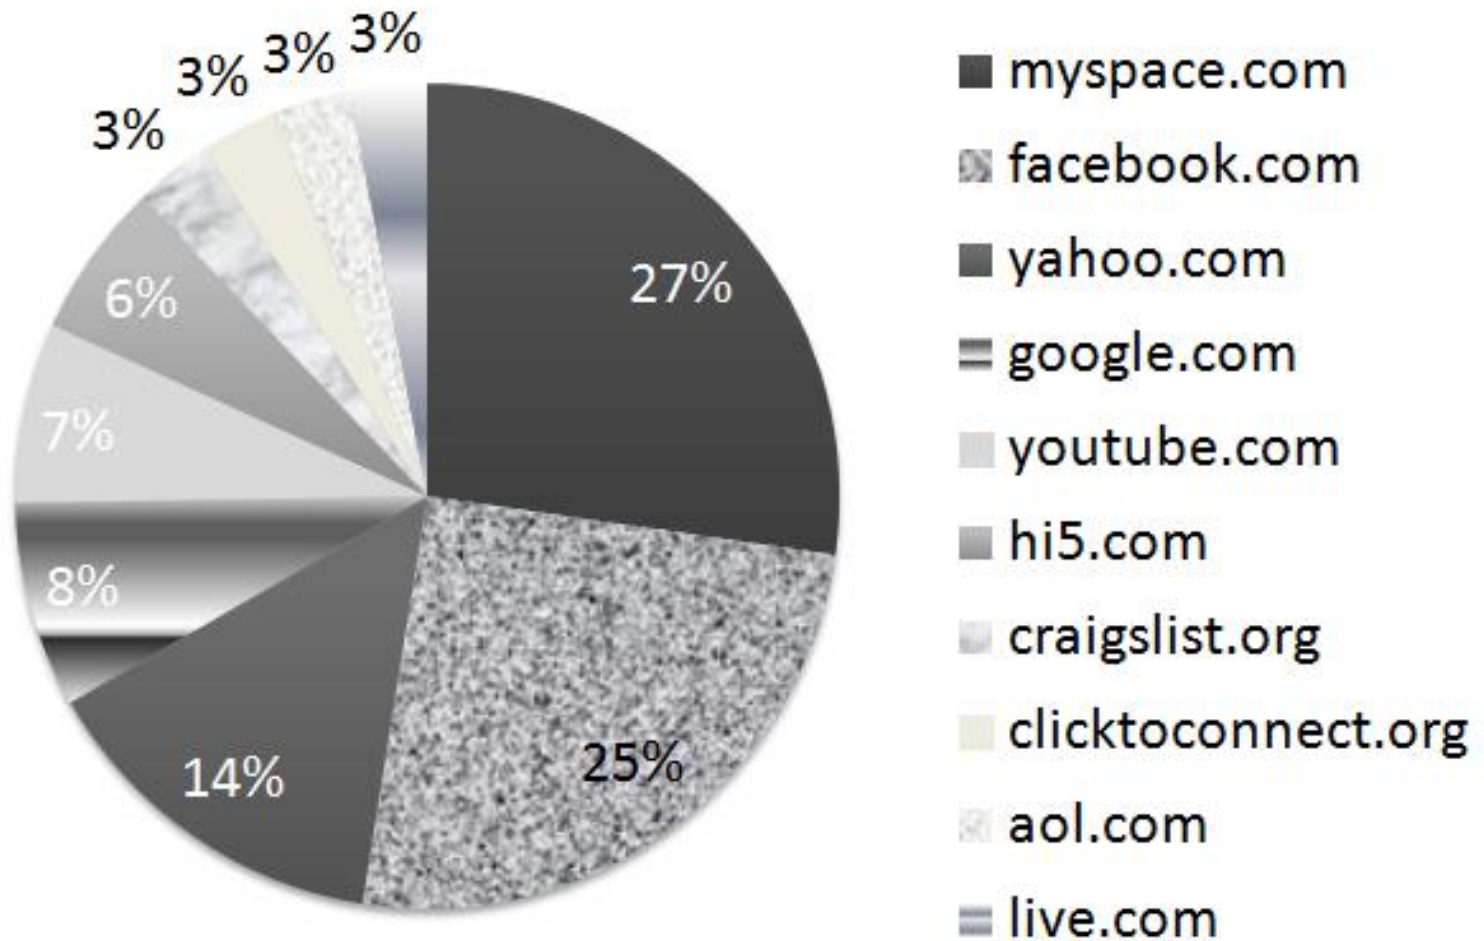

Supplement: supp_lgt029_jnci_JNCI_12_1831_s01.pdf [file supp_lgt029_jnci_JNCI_12_1831_s01.pdf]
